# Supplementary material
Source: Springer Nature journal article supplement (https://www.springermedizin.de/resource/supplementary/13041_2009_29_MOESM6_ESM.pdf/25657444)

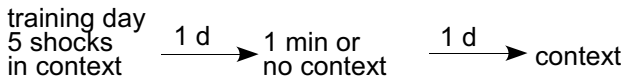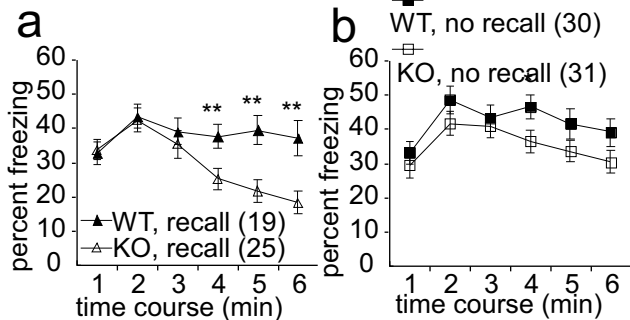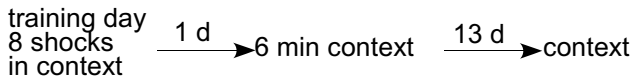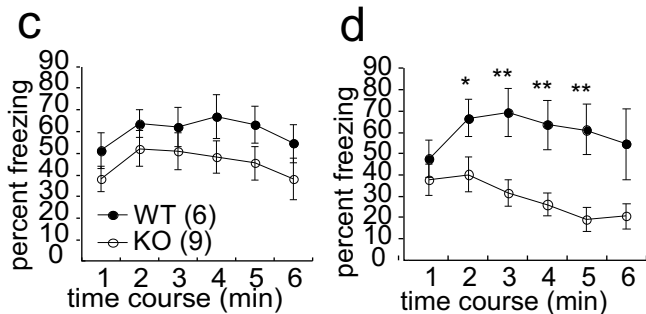

Supplement: MOESM6 [file 25657444]
